# Supplementary material for: Fermentative N-Methylanthranilate Production by Engineered Corynebacterium glutamicum
Source: MDPI journal article supplement (doi:10.3390/microorganisms8060866), 2020-06-08

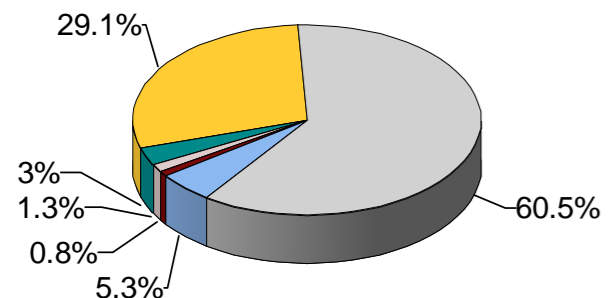

C1\* (pEKEEx3-*trpE*)

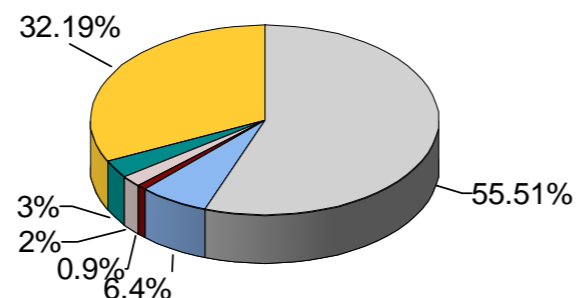

ARO01 (pEKEEx3-*trpE*)

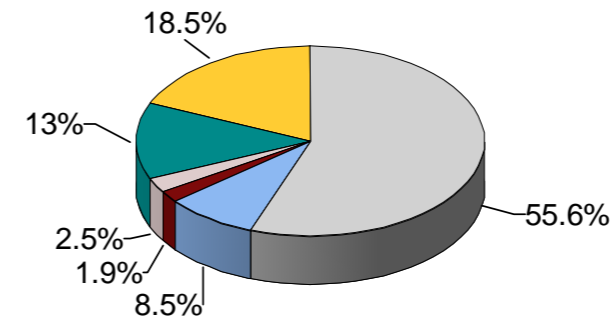

ARO02 (pEKEEx3-*trpE*)

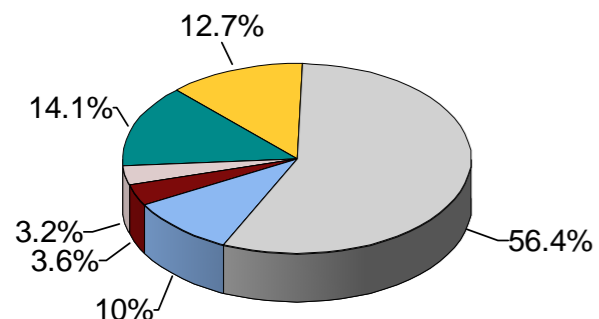

ARO03 (pEKEEx3-*trpE*)

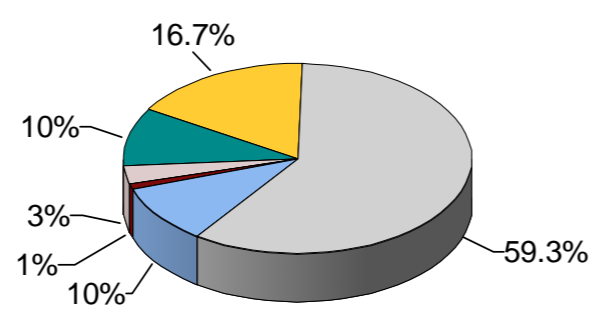

ARO04 (pEKEEx3-*trpE*)

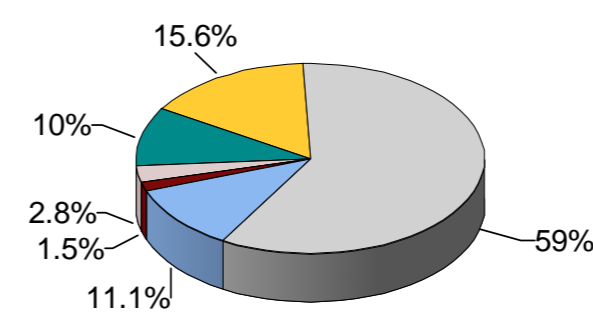

ARO05 (pEKEEx3-*trpE*)

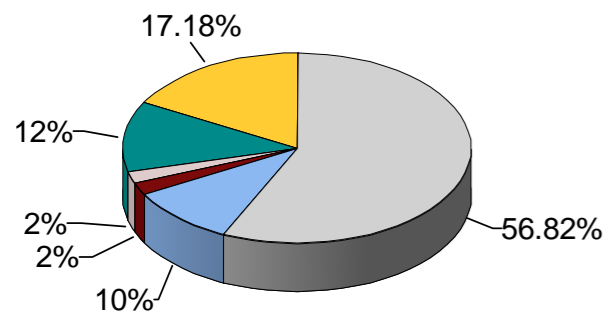

ARO06 (pEKEEx3-*trpE*)

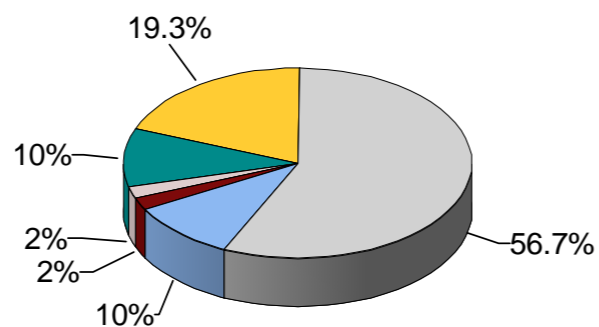

ARO07 (pEKEEx3-*trpE*)

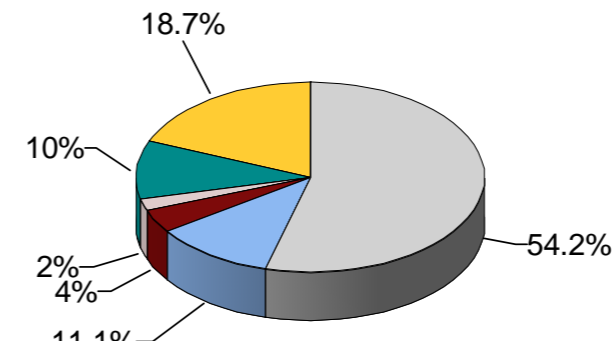

ARO08 (pEKEEx3-*trpE*)

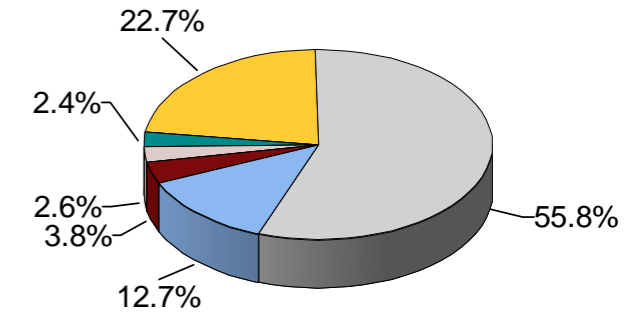

ARO09 (pEKEEx3-*trpE*)

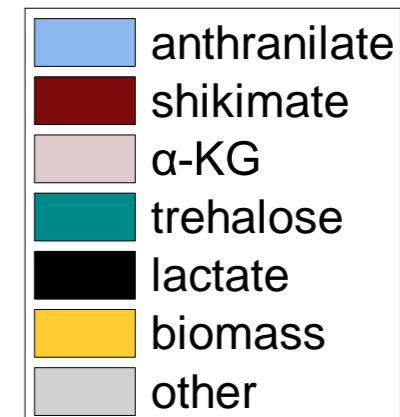

Supplement: s1 [file s1]
