# Supplementary figures and images for: Fermentative N-Methylanthranilate Production by Engineered Corynebacterium glutamicum
Source: MDPI journal article supplement (doi:10.3390/microorganisms8060866), 2020-06-08

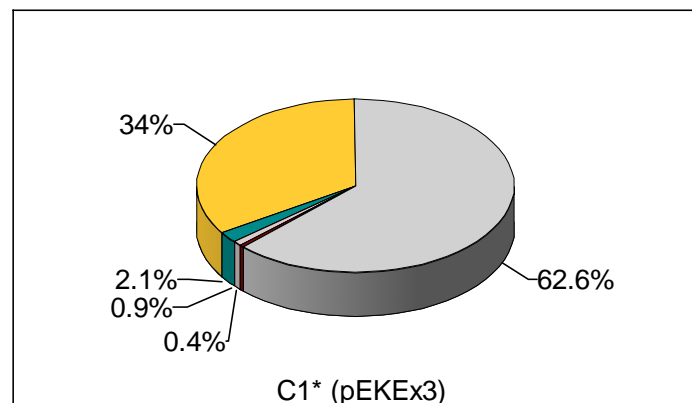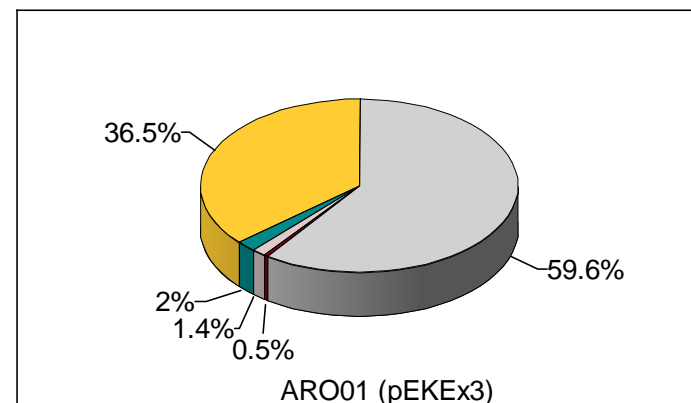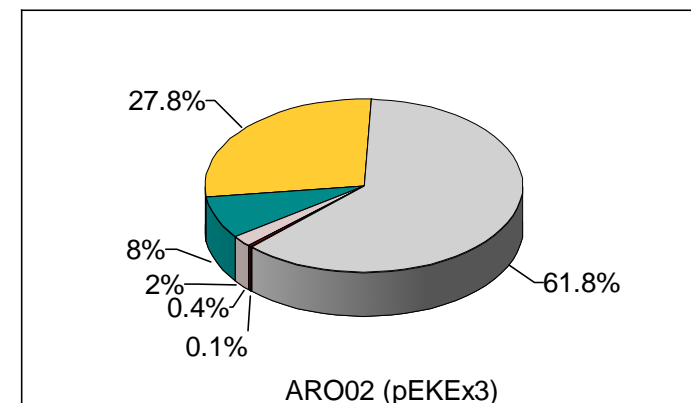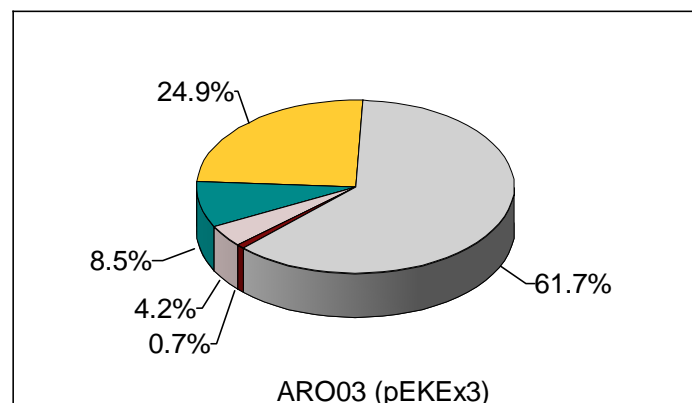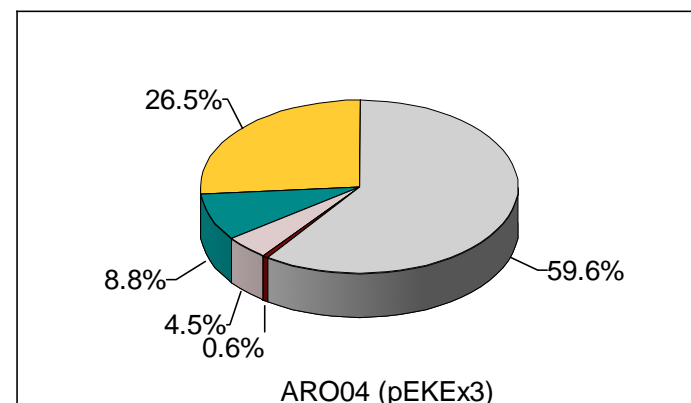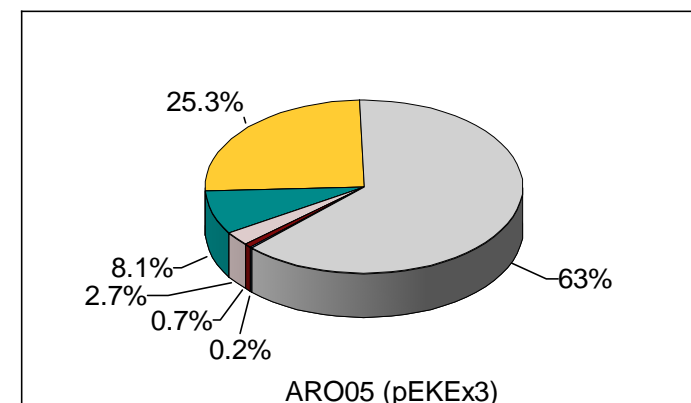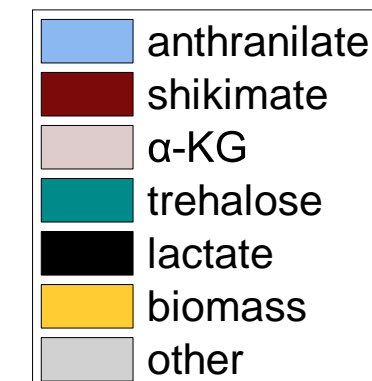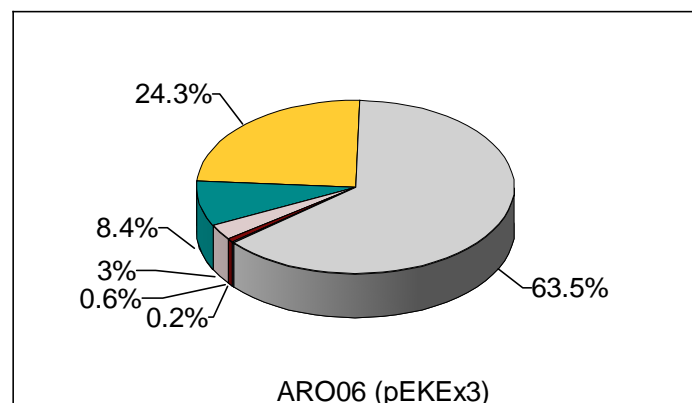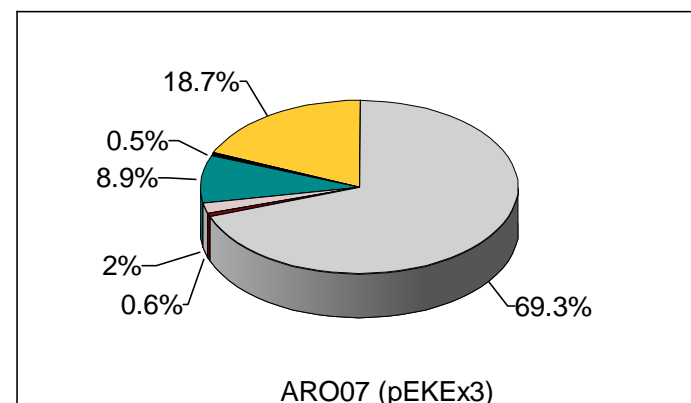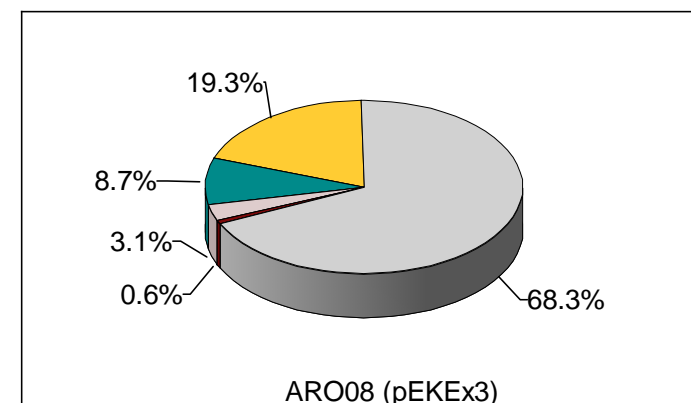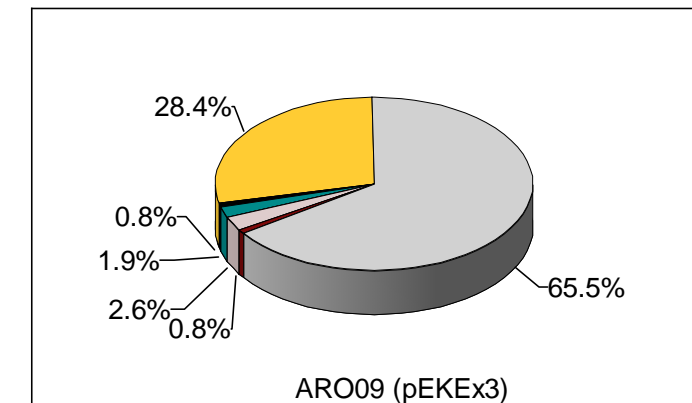

Supplement: s1 [file s1]
